# Supplementary material for: Fluorescent metal–organic polymers of zinc and cadmium from hydrothermal in situ acylation reaction
Source: Royal Society of Chemistry journal article supplement (doi:10.1039/c002946g), 2010-01-01
Supplement: c002946g.pdf [file c002946g.pdf]

## Fluorescent Metal-organic Polymers of Zinc and Cadmium from Hydrothermal in Situ Acylation Reaction

Xiao-Yang Yu,<sup>a,b</sup> Ling Ye,<sup>a</sup> Xiao Zhang,<sup>c</sup> Xiao-Bing Cui,<sup>a</sup> Jian-Po Zhang,<sup>b</sup> Ji-Qing Xu,<sup>\*a</sup> Qin Hou<sup>a</sup> and Tie-Gang Wang<sup>a</sup>

<sup>a</sup> College of Chemistry and State Key Laboratory of Inorganic Synthesis and Preparative Chemistry, Jilin University, Changchun, Jilin, 130021, China. Fax: +86-431-85168624; Tel: +86-431-88499132; E-mail: xjq@mail.jlu.edu.cn

<sup>b</sup> College of Chemical and Pharmaceutical Engineering, Jilin Institute of Chemical Technology, Jilin City, Jilin, 132022, P. R. China

<sup>c</sup> Research Academy of Science and Technology, Harbin Institute of Technology, Harbin, Heilongjiang, 150080, P. R. China

**Figure S1** The UV-Vis solid state diffuse reflection spectra for H<sub>4</sub>bbh (L) and compounds **1-4**.

**Table S1** Selected bond lengths (Å) and angles (°) for compounds **1-4**

**Table S2** Hydrogen-bonded parameters for compounds **1-4**

**Table S3** Selected  $\pi$ - $\pi$  interactions geometry for **1-4** (The plane-to-plane distance ( $d$ ), the dihedral angles ( $\alpha$ ), the centroid-centroid distance ( $c$ ) and the displacement angle between the planes ( $\theta$ )).

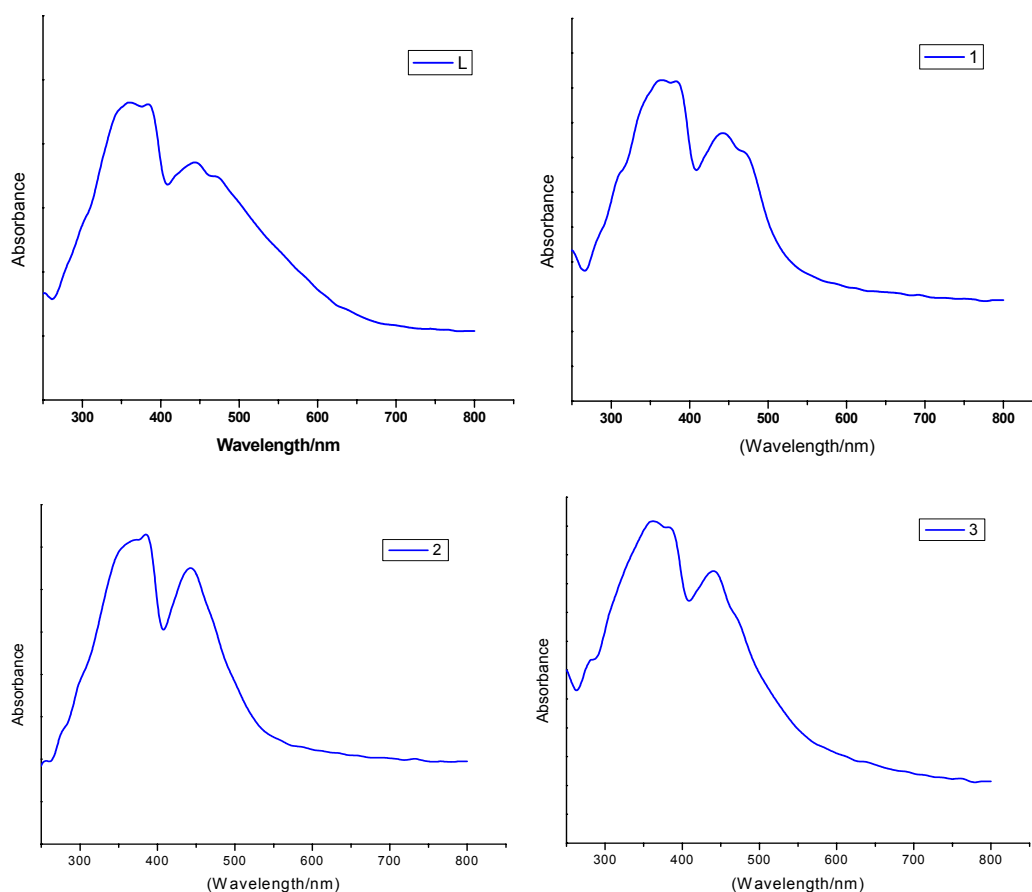

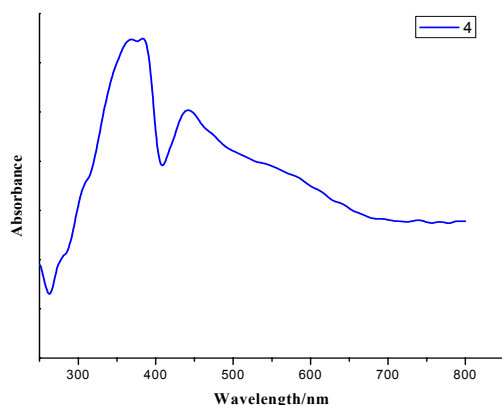

**Fig. S1** The UV-Vis solid state diffuse reflection spectra for H<sub>4</sub>bbh (L) and compounds **1-4**.

**Table S1** Selected bond lengths (Å) and angles (°) for compounds **1-4**

| <b>1</b>            |            |                    |            |                   |            |
|---------------------|------------|--------------------|------------|-------------------|------------|
| Zn(1)-O(2)          | 1.966(3)   | Zn(1)-O(3) A       | 1.986(3)   | Zn(1)-N(2)        | 2.120(4)   |
| Zn(1)-O(1)          | 2.143(3)   | Zn(1)-N(1)         | 2.154(3)   |                   |            |
| O(2)-Zn(1)-O(3) A   | 109.66(12) | O(2)-Zn(1)-O(1)    | 98.99(14)  | O(3) A-Zn(1)-O(1) | 91.06(13)  |
| O(2)-Zn(1)-N(2)     | 102.30(14) | N(2)-Zn(1)-O(1)    | 88.69(14)  | O(2)-Zn(1)-N(1)   | 111.25(13) |
| O(3) A-Zn(1)-N(2)   | 147.66(14) | O(3) A-Zn(1)-N(1)  | 86.42(13)  | N(2)-Zn(1)-N(1)   | 77.42(14)  |
| O(1)-Zn(1)-N(1)     | 148.69(16) |                    |            |                   |            |
| <b>2</b>            |            |                    |            |                   |            |
| Zn(1)-O(1) A        | 1.950(2)   | Zn(1)-N(2)         | 2.035(3)   | Zn(1)-N(3)        | 2.045(3)   |
| Zn(1)-N(1)          | 2.087(3)   | Zn(1)-O(2)         | 2.444(2)   |                   |            |
| O(1) A-Zn(1)-N(2)   | 111.90(11) | O(1) A-Zn(1)-N(3)  | 100.27(10) | N(2)-Zn(1)-N(3)   | 136.32(11) |
| O(1) A-Zn(1)-N(1)   | 113.10(10) | N(2)-Zn(1)-N(1)    | 80.33(11)  | N(3)-Zn(1)-N(1)   | 113.82(11) |
| O(1) A-Zn(1)-O(2)   | 97.72(9)   | N(2)-Zn(1)-O(2)    | 87.94(9)   | N(3)-Zn(1)-O(2)   | 58.26(9)   |
| N(1)-Zn(1)-O(2)     | 149.17(10) |                    |            |                   |            |
| <b>3</b>            |            |                    |            |                   |            |
| Zn(1)-O(3) A        | 1.923(2)   | Zn(1)-O(1)         | 1.925(2)   | Zn(1)-O(1W)       | 1.976(3)   |
| Zn(1)-N(3)          | 2.033(3)   |                    |            |                   |            |
| O(3) A-Zn(1)-O(1)   | 124.17(10) | O(3) A-Zn(1)-O(1W) | 102.53(12) | O(1)-Zn(1)-O(1W)  | 112.08(12) |
| O(3) A-Zn(1)-N(3)   | 115.59(11) | O(1)-Zn(1)-N(3)    | 95.39(10)  | O(1W)-Zn(1)-N(3)  | 106.28(12) |
| <b>4</b>            |            |                    |            |                   |            |
| Cd(1)-O(2) B        | 2.270(2)   | Cd(1)-O(2) C       | 2.285(2)   | Cd(1)-N(6)        | 2.330(3)   |
| Cd(1)-N(5)          | 2.331(3)   | Cd(1)-O(1)         | 2.367(2)   | Cd(1)-N(1)        | 2.373(3)   |
| O(2) B-Cd(1)-O(2) C | 72.85(8)   | O(2) B-Cd(1)-N(6)  | 108.20(9)  | O(2) C-Cd(1)-N(6) | 102.81(9)  |
| O(2) B-Cd(1)-N(5)   | 157.16(8)  | O(2) C-Cd(1)-N(5)  | 84.66(8)   | N(6)-Cd(1)-N(5)   | 72.39(10)  |
| O(2) B-Cd(1)-O(1)   | 95.00(8)   | O(2) C-Cd(1)-O(1)  | 106.31(8)  | N(6)-Cd(1)-O(1)   | 147.03(9)  |
| N(5)-Cd(1)-O(1)     | 95.12(9)   | O(2) B-Cd(1)-N(1)  | 84.72(8)   | O(2) C-Cd(1)-N(1) | 150.56(9)  |
| N(6)-Cd(1)-N(1)     | 102.18(9)  | N(5)-Cd(1)-N(1)    | 117.82(9)  | O(1)-Cd(1)-N(1)   | 56.02(8)   |

Symmetry codes for compound **1**: A -x+2, -y+1, -z+2

Symmetry codes for compound **2**: A -x, -y+1, -z+1

Symmetry codes for compound **3**: A -x+1, -y+1, -z+2.

Symmetry codes for compound **4**: B -x+1, -y+2, -z; C x, y-1, z.

**Table S2** Hydrogen-bonded parameters for compounds **1-4**

| D-H...A                                                                                              | <i>d</i> (D-H)( Å) | <i>d</i> (H..A)( Å) | <i>d</i> (D..A)( Å) | $\angle$ (D-H...A)( °) |
|------------------------------------------------------------------------------------------------------|--------------------|---------------------|---------------------|------------------------|
| <b>1</b>                                                                                             |                    |                     |                     |                        |
| N4-H4...O5 D                                                                                         | 0.86               | 1.98                | 2.838(4)            | 177                    |
| N6-H6...O4 C                                                                                         | 0.86               | 1.96                | 2.823(4)            | 176                    |
| O1-H1WA...O4 B                                                                                       | 0.80(5)            | 1.96(5)             | 2.738(5)            | 164(5)                 |
| O1-H1WB...N5 A                                                                                       | 0.87(10)           | 2.01(10)            | 2.761(5)            | 146(8)                 |
| <b>2</b>                                                                                             |                    |                     |                     |                        |
| N5-H5...O3 B                                                                                         | 0.86               | 1.92                | 2.778(3)            | 175                    |
| N6-H6...O4 D                                                                                         | 0.86               | 1.95                | 2.809(3)            | 175                    |
| C8-H8...O4 E                                                                                         | 0.93               | 2.33                | 3.198(4)            | 156                    |
| C1-H1...O3 B                                                                                         | 0.93               | 2.42                | 3.260(4)            | 150                    |
| <b>3</b>                                                                                             |                    |                     |                     |                        |
| O1W-H1WA...O2 B                                                                                      | 0.79(7)            | 1.87(7)             | 2.611(4)            | 156(7)                 |
| O1W-H1WB...O4 C                                                                                      | 0.83(7)            | 1.99(7)             | 2.786(4)            | 161(6)                 |
| N1-H1...O4 D                                                                                         | 0.86               | 2.02                | 2.859(4)            | 165                    |
| <b>4</b>                                                                                             |                    |                     |                     |                        |
| N2-H2...O4 G                                                                                         | 0.86               | 1.94                | 2.802(3)            | 175                    |
| N3-H3...O3 F                                                                                         | 0.86               | 1.95                | 2.810(3)            | 175                    |
| C13-H13...O4 E                                                                                       | 0.93               | 2.50                | 3.358(5)            | 153                    |
| Symmetry codes for compound <b>1</b> : A, 2-x, 1-y, 2-z; B, -1+x, y, z; C, x, -1+y, z; D, x, 1+y, z. |                    |                     |                     |                        |
| Symmetry codes for compound <b>2</b> : B, x, 1+y, z; D, x, -1+y, z; E, 1+x, y, -1+z.                 |                    |                     |                     |                        |
| Symmetry codes for compound <b>3</b> : B x, y, z+1; C 1-x, 2-y, 2-z; D -1+x, -1+y, -1+z.             |                    |                     |                     |                        |
| Symmetry codes for compound <b>4</b> : E 1-x, 1-y, 1-z; F 1+x, y, z; G -1+x, y, z.                   |                    |                     |                     |                        |

**Table S3** Selected  $\pi$ - $\pi$  interactions geometry for **1-4** (The plane-to-plane distance ( $d$ ), the dihedral angles ( $\alpha$ ), the centroid-centroid distance ( $c$ ) and the displacement angle between the planes ( $\theta$ )).

| $\pi$ - $\pi$ interactions                                                                                                                                                                                                                                                                                                                                                                                                                 | $d$ (Å) | $\alpha$ (°) | $c$ (Å) | $\theta$ (°) | Symmetry codes      |
|--------------------------------------------------------------------------------------------------------------------------------------------------------------------------------------------------------------------------------------------------------------------------------------------------------------------------------------------------------------------------------------------------------------------------------------------|---------|--------------|---------|--------------|---------------------|
| <b>1</b>                                                                                                                                                                                                                                                                                                                                                                                                                                   |         |              |         |              |                     |
| Cg1→Cg1 #1 (intra-molecular)                                                                                                                                                                                                                                                                                                                                                                                                               | 3.356   | 0.00         | 3.6984  | 24.86        | #1 (2-x,1-y,2-z)    |
| Cg1→Cg2 #2 (inter-moleculars)                                                                                                                                                                                                                                                                                                                                                                                                              | 3.434   | 2.94         | 3.6135  | 18.15        | #2 (1+x,y,z)        |
| Cg2→Cg2 #3 (inter-moleculars)                                                                                                                                                                                                                                                                                                                                                                                                              | 3.435   | 0.00         | 3.7207  | 22.58        | #3 (1-x, 1-y, 1-z)  |
| Ring 1: C <sub>14</sub> C <sub>15</sub> C <sub>16</sub> C <sub>17</sub> C <sub>20</sub> C <sub>21</sub> ; Ring 2: C <sub>4</sub> C <sub>5</sub> C <sub>6</sub> C <sub>7</sub> C <sub>8</sub> C <sub>9</sub><br>Centroid coordinates: Cg1, (1.09793, 0.56820, 0.85922); Cg2, (0.29822, 0.55372, 0.57092).                                                                                                                                   |         |              |         |              |                     |
| <b>2</b>                                                                                                                                                                                                                                                                                                                                                                                                                                   |         |              |         |              |                     |
| Cg1→Cg1 #1 (intra-molecular)                                                                                                                                                                                                                                                                                                                                                                                                               | 3.345   | 0.00         | 3.9227  | 31.50        | #1 (-x,1-y,1-z)     |
| Cg1→Cg1 #2 (inter-molecular)                                                                                                                                                                                                                                                                                                                                                                                                               | 3.340   | 0.00         | 3.7109  | 25.84        | #2 (-1-x, 1-y, 1-z) |
| Cg2→Cg3 #3 (inter-molecular)                                                                                                                                                                                                                                                                                                                                                                                                               | 3.391   | 3.25         | 3.7846  | 26.35        | #3 (-x, 2-y, -z)    |
| Cg2→Cg3 #4 (inter-molecular)                                                                                                                                                                                                                                                                                                                                                                                                               | 3.469   | 3.25         | 3.8296  | 25.08        | #4 (1-x, 2-y, -z)   |
| Ring 1: C <sub>11</sub> C <sub>13</sub> C <sub>14</sub> C <sub>17</sub> C <sub>18</sub> C <sub>20</sub> ; Ring 2: C <sub>1</sub> C <sub>2</sub> C <sub>3</sub> C <sub>4</sub> C <sub>5</sub> N <sub>1</sub> ; Ring 3: C <sub>6</sub> C <sub>7</sub> C <sub>8</sub> C <sub>9</sub> C <sub>10</sub> N <sub>2</sub><br>Coordinates: Cg1, (-0.22922, 0.42980, 0.47035); Cg2, (0.20342, 1.11457, 0.04390); Cg3, (0.34955, 0.74333, -0.09783).   |         |              |         |              |                     |
| <b>3</b>                                                                                                                                                                                                                                                                                                                                                                                                                                   |         |              |         |              |                     |
| Cg1→Cg2 #1 (inter-layers)                                                                                                                                                                                                                                                                                                                                                                                                                  | 3.356   | 6.17         | 3.6516  | 23.22        | #1 (x, y, -1+z)     |
| Ring 1: C <sub>6</sub> C <sub>9</sub> C <sub>10</sub> C <sub>6a</sub> C <sub>9a</sub> C <sub>10a</sub> ; Ring 2: C <sub>4</sub> C <sub>1</sub> C <sub>3</sub> C <sub>4b</sub> C <sub>1b</sub> C <sub>3b</sub> , (a: 1-x, 2-y, 1-z, b: x, y, -1+z)<br>Coordinates: Cg1, (0.5, 1, 0.5); Cg2, (1, 1, 1.5).                                                                                                                                    |         |              |         |              |                     |
| <b>4</b>                                                                                                                                                                                                                                                                                                                                                                                                                                   |         |              |         |              |                     |
| Cg1→Cg1 #1 (intra-chain)                                                                                                                                                                                                                                                                                                                                                                                                                   | 3.329   | 0.02         | 3.8542  | 30.26        | #1 (1-x, 2-y, -z)   |
| Cg2→Cg3 #2 (inter-chains)                                                                                                                                                                                                                                                                                                                                                                                                                  | 3.483   | 3.02         | 3.6307  | 16.38        | #2 (-x,1-y, 1-z)    |
| Ring 1: C <sub>3</sub> C <sub>4</sub> C <sub>6</sub> C <sub>8</sub> C <sub>7</sub> C <sub>5</sub> ; Ring 2: C <sub>11</sub> C <sub>12</sub> C <sub>13</sub> C <sub>14</sub> C <sub>15</sub> N <sub>5</sub> ; Ring 3: C <sub>17</sub> C <sub>18</sub> C <sub>19</sub> C <sub>20</sub> C <sub>16</sub> N <sub>6</sub><br>Coordinates: Cg1, (0.50618, 1.04165, 0.16502); Cg2, (0.29615, 0.33728, 0.44047); Cg3, (-0.00635, 0.48269, 0.24633). |         |              |         |              |                     |
